# Supplementary material for: Temporal Dynamics of T Helper Populations in the Proximal Small Intestine after Oral Bovine Lactoferrin Administration in BALB/c Mice
Source: MDPI journal article supplement (doi:10.3390/nu13082852), 2021-08-19
Supplement: s1 [file s1]

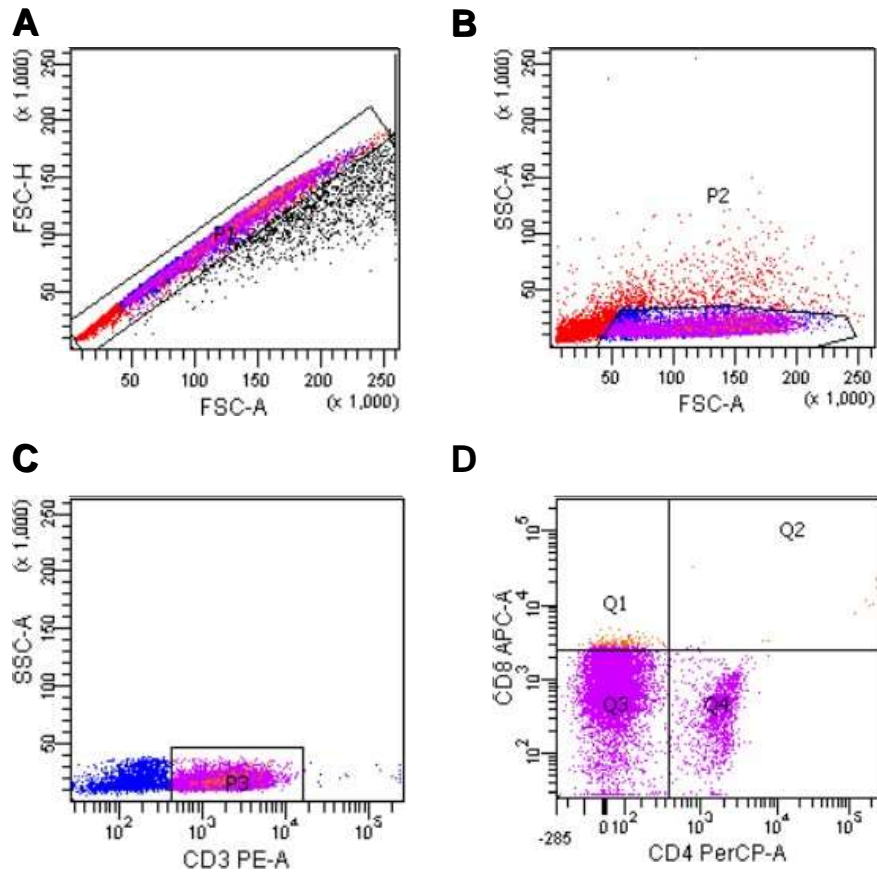

**Figure S1. Gating strategy for analysis of CD4<sup>+</sup> and CD8<sup>+</sup> T cells.** Single cells were gated using FSC-A and FSC-H (A). Cells were gated based on size and granularity using FSC-A and SSC-A to determine lymphocyte region (B). CD3<sup>+</sup> (PE) T cells were selected for further analysis (C). Subsequently, CD4<sup>+</sup> (PerCP) and CD8<sup>+</sup> (APC) T cells were analyzed.

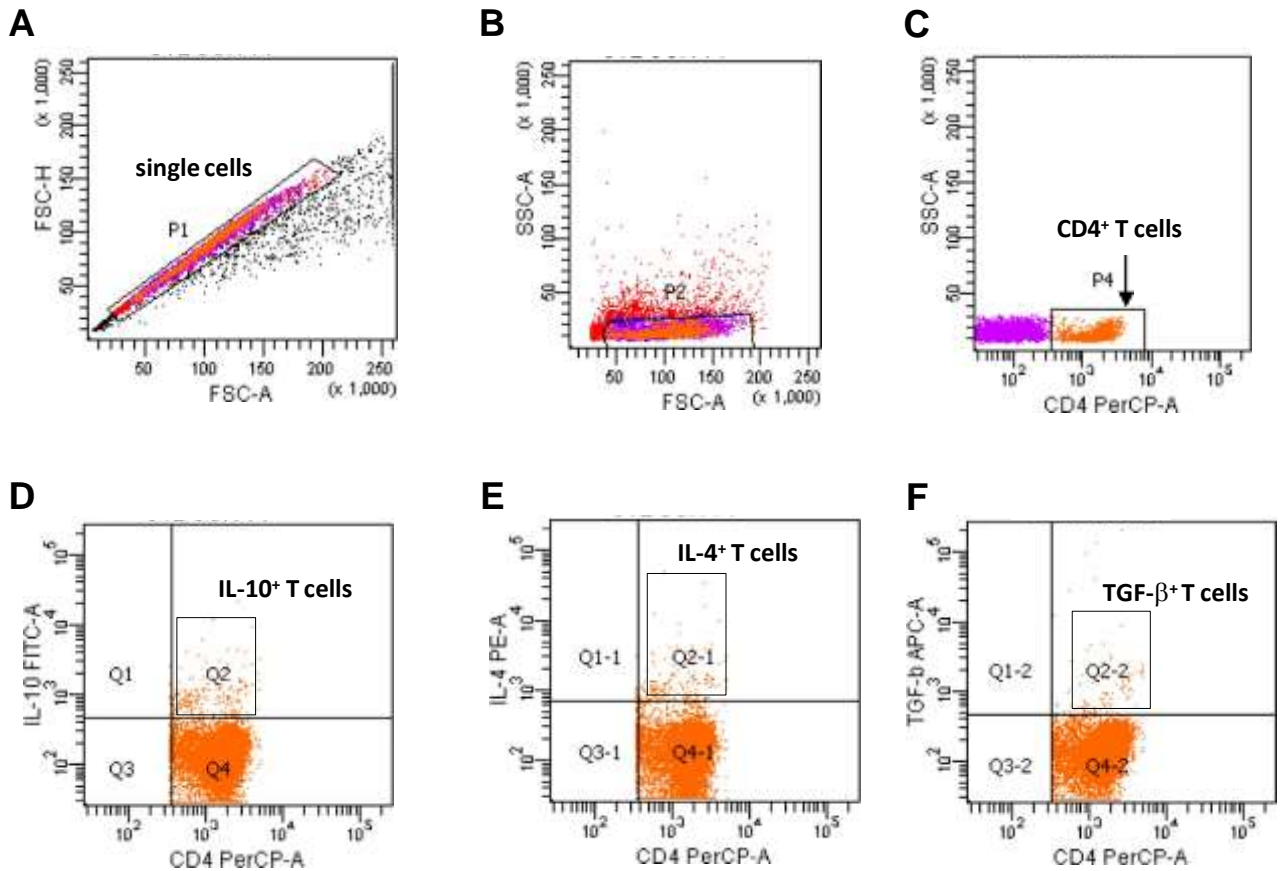

**Figure S2. Gating strategy for intracellular cytokines of CD4<sup>+</sup> T cells in lamina propria of the proximal small intestine.** Single cells were gated using FSC-A and FSC-H (A). Cell were gated based on size and granularity using FSC-A and SSC-A to determinate lymphocyte region (B). CD4<sup>+</sup> (PerCP) T cells were selected for further analysis (C). Subsequently, CD4<sup>+</sup> (PerCP) T cells was followed by examination of expression of IL-10 (FITC) (D), IL-4 (PE) (E) and TGF- $\beta$  (APC) (F)
